# Supplementary material for: Wie können unterschiedliche Aspekte diagnostischer Kompetenz gefördert werden?
Source: Atypon-hosted journal article supplement (doi:10.1024/1010-0652/a000352), 2022-09-30
Supplement: 1010-0652_a000352_esm1.pdf [file 1010-0652_a000352_esm1.pdf]

**ESM 1: Inhalte der Online-Materialsammlung**

---

**(1) Liste an Literatur, die den Studierenden in allen drei Fördermaßnahmen für die Kleingruppenarbeit zur Verfügung gestellt wurde**

- Jungmann, T. (2009). Lese-Rechtschreib-Förderung. In A. Lohaus & H. Domsch (Hrsg.), *Psychologische Förder- und Interventionsprogramme für das Kindes- und Jugendalter* (S. 99–112). Heidelberg: Springer-Medizin-Verl. [https://doi.org/10.1007/978-3-540-88384-5\\_8](https://doi.org/10.1007/978-3-540-88384-5_8)
- Marx, H., Reinhold, B., & Schneider, W. (2010). Lese-Rechtschreibschwierigkeiten. *Handwörterbuch Pädagogische Psychologie*, 4, 495-507.
- Runderlass des Kultusministeriums Nordrhein-Westfalen vom 19.07.1991, 14-01 Nr. 1, Förderung von Schülerinnen und Schülern bei besonderen Schwierigkeiten im Erlernen des Lesens und Rechtschreibens (LRS), S. 174, <https://bass.schulwelt.de/280.htm>.
- Steinbrink, C. & Lachmann, T. (2014). Klassifikation und Erscheinungsbild der Lese-Rechtschreibstörung. In C. Steinbrink & T. Lachmann (Hrsg.), *Lese-Rechtschreibstörung. Grundlagen, Diagnostik, Intervention* (S. 49–86). Berlin: Springer VS. [https://doi.org/10.1007/978-3-642-41842-6\\_3](https://doi.org/10.1007/978-3-642-41842-6_3)
- Warnke, A. & Roth, E. (2000). Umschriebene Lese-Rechtschreibstörung. In F. Petermann (Hrsg.), *Lehrbuch der klinischen Kinderpsychologie und -psychotherapie* (4., vollst. überarb. und erw. Aufl., S. 453–476). Göttingen: Hogrefe Verl. für Psychologie.

**(2) 10 bis 15-minütige, selbst erstellte Lehrvideos zu den folgenden Themen**

- Lese-Rechtschreibstörung (Einführung Teil I) – 27:57 min
- Lese-Rechtschreibstörung (Einführung Teil II) – 27:57 min
- Videosteckbrief: Hamburger Schreibprobe (HSP) – 10:58 min
- Videosteckbrief: ELFE II – 8:49 min
- Videosteckbrief: Lesespiele mit Elfe und Mathis – 7:42 min
- Videosteckbrief: PHONIT – 6:19 min

### (3) Skript zur Übersicht über die Lese-Rechtschreibstörung

#### Inhalt:

- Lernstörung
  - Klassifikation nach ICD-10
- Lese-Rechtschreibstörung
  - Abgrenzung verwandter Begriffe
  - Epidemiologie
  - Symptome beim Rechtschreiben und Lesen
  - Komorbiditäten, Begleitsymptome und Folgestörungen
  - Diagnostik
    - Multiaxiale Diagnostik
    - Basis- und Zusatzdiagnostik
    - Doppeltes Diskrepanzkriterium
  - Ätiologie
    - Multidimensionales Bedingungsmodell
    - Vorläuferfähigkeiten: Phonologische Bewusstheit
    - Risiko- und Schutzfaktoren
  - Förderung
    - Ziele der Förderung
    - Multimodale Intervention
  - Prognose und Verlauf
- LRS-Erlass (<https://bass.schul-welt.de/280.htm>)

#### Literaturhinweise

Fischbach, A., Schuchardt, K., Brandenburg, J., Kleszczewski, J., Balke-Melcher, C., Schmidt, C., ... & Hasselhorn, M. (2013). Prävalenz von Lernschwächen und Lernstörungen: Zur Bedeutung der Diagnosekriterien. *Lernen und Lernstörungen*, 2, 65 – 76.

Hasselhorn, M., Schneider, W. & Marx, H. (2000). Diagnostik von Lese-Rechtschreibschwierigkeiten (Jahrbuch der pädagogisch-psychologischen Diagnostik. Test und Trends, Bd. 1). Göttingen: Hogrefe.

Jungmann, T. (2009). Lese-Rechtschreib-Förderung. In A. Lohaus & H. Domsch (Hrsg.), *Psychologische*

- Lenhard, W. & Schneider, W. (2009). Diagnostik und Förderung des Leseverständnisses (Jahrbuch der pädagogisch-psychologischen Diagnostik. Test und Trends, Bd. 7). Göttingen: Hogrefe.
- Schleider, K. (2009). Lese- und Rechtschreibstörungen. München: Ernst Reinhardt.
- Schneider, W., Marx, H. & Hasselhorn, M. (2008). Diagnostik von Rechtschreibleistung und Kompetenz (Jahrbuch der pädagogisch-psychologischen Diagnostik. Test und Trends, Bd. 6). Göttingen: Hogrefe.
- Warnke, A., Hemminger, U. & Plume, E. (2004). Lese-Rechtschreibstörungen (Leitfaden Kinder- und Jugendpsychotherapie, Bd. 6). Göttingen: Hogrefe.
- Wong, B. Y. L. (2008). Lernstörungen verstehen. Ein Praxishandbuch für Psychologen und Pädagogen (3. Aufl.). Berlin: Spektrum Akademischer Verlag.
