# Supplementary material for: Wie können unterschiedliche Aspekte diagnostischer Kompetenz gefördert werden?
Source: Atypon-hosted journal article supplement (doi:10.1024/1010-0652/a000352), 2022-09-30
Supplement: 1010-0652_a000352_esm2.pdf [file 1010-0652_a000352_esm2.pdf]

## ESM 2: Arbeitsaufträge, Fallbeispiel und Screenshots der digitalen Simulation

---

### (1) Arbeitsaufträge für die lehrendenzentrierte Gruppe

- a) In der nächsten Sitzung werden Sie **in Gruppenarbeit ein virtuelles Plakat erstellen**, auf welchem Sie die wichtigsten Inhalte zum Thema LRS zusammenfassend darstellen sollen.
- b) Vorbereitend dazu finden Sie im PANDA-Kurs Z.EXT.00190 zum Thema LRS **Lernmaterialien, die Sie sich bis zur nächsten Sitzung anschauen und erarbeiten** sollen, sodass Sie dann direkt mit der Gruppenarbeit starten können. Für den Kurs benötigen Sie keinen Einschreibeschlüssel.  
  
**Wichtig:** Bitte testen Sie bis dahin Ihr Mikrofon oder, falls Sie kein Mikrofon an Ihrem PC nutzen können, melden Sie sich in BBB zusätzlich über Ihr Smartphone an.
- c) Tauschen Sie sich in Ihrem **Breakoutraum** in der Gruppe über die Lernmaterialien aus und klären Sie ggf. offene Fragen.
- d) Sichern Sie Ihre **Ergebnisse auf einer Folie**, die Sie gemeinsam im Breakoutraum bearbeiten können. Sichern Sie die Folie mit einem Screenshot. Inhaltlich sollen Sie dabei die folgenden Bereiche berücksichtigen:
  - a. Hintergrund: Symptomatik, Klassifikation, Ätiologie & Epidemiologie
  - b. Diagnostik: Vorgehen, Verfahren
  - c. Förderung: Ansätze, Programme

## (2) Fallbeispiel für die problemorientiert lernende Gruppe

### Realschullehrer Marcel Karasek und der Schüler Timo:

„Seit mittlerweile fast einem Schulhalbjahr unterrichte ich eine 5. Klasse im Fach Deutsch. Nach den Herbstferien habe ich in dieser Klasse eine Unterrichtseinheit zu orthografischen Strategien durchgeführt, in der es mir vor allem um die Vermittlung von Strategien zur Differenzierung von langen und kurzen Vokalen bzw. von Ein-fach- und Doppelkonsonanten (z. B. „Krume“ vs. „krumme“), von weichen und harten Mittellauten (b – p, g – k, d – t) sowie von verschiedenen s-Lauten (s – ss – ß) ging. Überprüft habe ich die Schülerleistungen dabei sowohl anhand von vorwiegend ungeübten Diktaten als auch anhand von Lückentextaufgaben. Leider musste ich am Ende der Unterrichtseinheit feststellen, dass nach wie vor ca. ein Viertel der Fünftklässlerinnen und Fünftklässler substantielle Schwierigkeiten auch bei der Bewältigung der behandelten orthografischen Problembereiche aufwies.

Besonders aufgefallen ist mir in diesem Zusammenhang der elfjährige Timo, der in jeder der Leistungsfeststellungsprüfungen außerordentlich viele Fehler produziert hat und mit seinen Rechtschreibleistungen am unteren Ende der Klassenverteilung steht. Allerdings konnte ich diese extreme Fehlerhäufigkeit nur in ungeübten Diktaten beobachten. In Diktaten, die er sich vorher einprägen konnte, hat Timo zwar keinesfalls fehlerfrei, im Vergleich zu seinen sonstigen Rechtschreibleistungen aber deutlich besser abgeschnitten. Seine Aufsätze und Klassenarbeiten, in denen es z. B. um die Nacherzählung einer Geschichte ging, konnte ich in der Vergangenheit trotz inhaltlich guter Leistungen wiederum oft nur mit „ausreichend“ bewerten, weil seine Rechtschreibung auch in diesen Arbeiten „mangelhaft“ oder sogar „ungenügend“ war.

Ganz konkret sind bei Timo häufig wechselnde Falschschreibungen zu beobachten: In einer Arbeit hat er beispielsweise die Namen „Gertrud“ und „Barbara“ mehrfach falsch geschrieben und dabei jedes Mal einen anderen Fehler gemacht (z. B. „Babra“, „Babera“ und „Brabara“). Weiterhin beziehen sich seine Fehlerschwerpunkte auf die Groß- und Kleinschreibung (z. B. „hausaufgaben Machen“) sowie auf ausgelassene Buchstaben (z. B. „Nse“ statt „Nase“ oder „komen“ statt „kommen“), hinzugefügte Buchstaben (z. B. „flinck“ statt „flink“ oder „Grahs“ statt „Gras“), vertauschte Buchstaben (z. B. „dei“ statt „die“ oder „leib“ statt „lieb“) und fehlerhafte Buchstaben (z. B. „Hende“ statt „Hände“ oder „Wlais“ statt „Fleiß“). Weder schreibt Timo Wörter konsequent so, wie man sie spricht, noch zeigt er beim Schreiben ein orthografisches Regelverständnis. Ausgehend von diesen Beobachtungen habe ich erst kürzlich mit Timo vereinbart, dass er seine Texte grundsätzlich noch einmal auf Fehler kontrolliert, bevor er sie mir abgibt. Schnell ist jedoch deutlich geworden, dass Timo seine Fehler in der Regel nicht ohne fremde Hilfe identifizieren, geschweige denn korrigieren kann. Mitunter ist es sogar vorgekommen, dass er ursprünglich richtig geschriebene Wörter fälschlicherweise einer ‚Korrektur‘ unterzogen hat. Vor diesem Hintergrund ist es geradezu verwunderlich, dass Timos Rechtschreibproblematik in der Primarstufe unentdeckt geblieben sein soll.

Im Lesen gehört Timo zwar eher zu den langsamen Lesern, auch verrutscht er beim lauten Vorlesen häufiger mal in der Zeile, kann das Gelesene zumeist aber dennoch in eigenen Worten wiedergeben, zeigt also keine Besorgnis erregenden Beeinträchtigungen des Leseverständnisses. Abgesehen von seinen Schwierigkeiten mit der Schriftsprache verfügt Timo – zumindest soweit ich das in meiner Funktion als Deutschlehrer beurteilen kann – durchaus über elaborierte Sprachfertigkeiten. Auch scheint er ansonsten eine rasche Auffassungsgabe zu haben und schnell zu lernen.

In einem Gespräch mit dem Klassenlehrer und weiteren Lehrkräften, die in Timos Klasse unterrichten, konnte ich in Erfahrung bringen, dass sich Timos Defizit mittlerweile auch auf die Zensuren in anderen Unterrichtsfächern auswirkt. So habe er beispielsweise auch im Englischen Schwierigkeiten mit der Schreibweise von Vokabeln. Im Mathematikunterricht hapere es mitunter am Verständnis von Textaufgaben. Ansonsten zeige Timo jedoch ein gutes Verständnis für mathematische Operationen und Zusammenhänge.

Am letzten Elternsprechtag hatte ich ferner Gelegenheit, ein Gespräch mit Timos Mutter zu führen. Sie schilderte, dass Timo in der Grundschule – wenn überhaupt – eher durch sein stockendes Lesen als durch übermäßig viele Rechtschreibfehler aufgefallen sei. Außerdem erzählte sie, Timo habe seit dem Herbst bereitwillig und freiwillig geübt, um seine Rechtschreibung zu verbessern, neulich jedoch erstmals entmutigt aufgegeben und sich weiteren Übungen verweigert. Grundsätzlich halte sie Timo für begabt. Was sie immer schon beeindruckt habe, sei sein Talent, sich in kürzester Zeit umfassende Informationen einprägen zu können.“

### **(3) Arbeitsaufträge für die problembasiert lernende Gruppe**

#### **Schritt 1: Lesen**

Lesen Sie die Falldarstellung. Haben Sie alles verstanden? Besprechen Sie sich in der Gruppe oder fragen Sie im Plenum nach, wenn Ihnen etwas unklar ist.

#### **Schritt 2: Problembeschreibung**

Fassen Sie die Problemsituation in eigenen Worten zusammen, ohne sie bereits zu interpretieren! Gehen Sie dabei auch auf Distanz zur erzählenden Person.

#### **Schritt 3a: Erste Hypothesensammlung**

Überlegen Sie, welche Alltagserfahrungen und welches Hintergrundwissen Ihnen nützlich sein könnten, um das Problem zu analysieren. Ist Ihnen in Ihrer eigenen Schulzeit oder im Eignungs- und Orientierungspraktikum schon mal eine ähnliche Situation begegnet? Erinnern Sie sich an Lerninhalte aus Ihrer Schulzeit oder im Studium, die Ihnen jetzt hilfreich sein könnten?

Nehmen Sie das, was Sie bereits wissen, was Sie erfahren haben oder was Ihnen Ihr gesunder Menschenverstand nahelegt, als Ausgangspunkt und formulieren Sie Hypothesen, die das Schüler-, Lehrer- und ggf. Elternverhalten in der Falldarstellung möglichst gut beschreiben und erklären können.

#### **Schritt 3b: Hypothesenmodifikation und -selektion**

Bei der Hypothesensammlung handelt es sich um einen Prozess, der in der Regel mehrere Schleifen durchläuft. Tauschen Sie sich daher in der Gruppe über Ihre Hypothesen aus und diskutieren Sie deren Plausibilität und Stichhaltigkeit. Anregungen zur Hypothesenselektion:

- Was in der Falldarstellung spricht für, was gegen die jeweilige Hypothese?
- Inwieweit ist die Hypothese wirklich auf die Falldarstellung bezogen? Bzw. inwieweit ist mehr in die Falldarstellung „hineingelesen“ worden als drinsteckt?

#### **Schritt 3c: Erste Überlegungen zu Diagnostik und Förderung**

Erinnern Sie sich an die methodischen Grundlagen, die bereits im Seminar besprochen wurden. Überlegen Sie gemeinsam, welche diagnostischen Zugänge Sie wählen könnten, um Ihre Problemeinschätzung bzw. Ihre Hypothesen zu überprüfen.

Gesetzt den Fall, Ihre Hypothesen würden einer Überprüfung standhalten: Welche Maßnahmen würden Sie wählen, um das problematische Verhalten zu verändern? Stellen Sie auch hierzu Überlegungen in der Gruppe an.

#### **Schritt 4: Vorbereitung des Selbststudiums**

Halten Sie anschließend für jede Hypothese fest, was Ihnen noch an inhaltlichen und methodisch-diagnostischen Informationen fehlt, um über deren Gültigkeit entscheiden zu können.

Legen Sie in Ihrer Gruppe Themen und Ziele für die Informationsbeschaffung und das Literaturstudium fest. Überlegen Sie, ob Sie arbeitsteilig vorgehen wollen und verteilen Sie die Aufgaben ggf. so, dass jede/r Verantwortung für mindestens einen Themenbereich übernimmt.

#### **Schritt 5a: Aktivierung von Hintergrundwissen (Selbststudium)**

Um Ihre bisherigen Erkenntnisse zu vertiefen und zu ergänzen, finden Sie vorbereitend auf die nächste Sitzung im [REDACTED] Lernmaterialien, die Sie für die Erarbeitung des Fallbeispiels benötigen. Erarbeiten Sie sich ausgehend von den vereinbarten Themen und Zielen das theoretische Hintergrundwissen, das bei der Erschließung und Lösung der Problemsituation hilfreich sein könnte. Nutzen Sie dazu die bereitgestellte Online-Materialsammlung. Präzisieren bzw. modifizieren Sie Ihre Hypothesen ggf. aufgrund des theoretischen Hintergrundes, den Sie sich angeeignet haben.

Fassen Sie die theoretischen Inhalte zunächst zusammen. Wählen Sie die zusammenzufassenden Inhalte dabei so aus, dass der theoretische Hintergrund auf die Falldarstellung zugeschnitten ist. Präzisieren bzw. modifizieren Sie Ihre Hypothesen ggf. aufgrund des theoretischen Hintergrundes, den Sie sich über die Fachliteratur angeeignet haben.

#### **Schritt 5b: Erarbeitung der Lösungsskizze**

Formulieren Sie auf der Grundlage aus Schritt 5a einen theoretisch fundierten (Teil-)Lösungsansatz, der folgende Aspekte aufgreift:

- theoriegeleitete Problemerkörterung unter Verwendung von Fachbegriffen,
- ggf. Ansätze zur Erklärung und Aufrechterhaltung der „Symptomatik“,
- Möglichkeiten einer systematischen diagnostischen Erkenntnissicherung,

- Möglichkeiten der Förderung und Intervention.

**Schritt 6a: Ergebnissicherung 1**

Diskutieren Sie die entwickelten Lösungsansätze. Verabschieden Sie sich ggf. auch von ungeeigneten Lösungsansätzen und entscheiden Sie sich gemeinsam für den geeignetsten Lösungsansatz. Welche Hypothesen halten stand? Welche verwerfen Sie?

**Schritt 6b: Ergebnissicherung 2**

Sichern Sie Ihre Ergebnisse auf einer Folie, die Sie gemeinsam im Breakoutraum erarbeiten. Sichern Sie die Folie mit einem Screenshot. Inhaltlich sollen Sie dabei die folgenden Bereiche berücksichtigen:

- Hintergrund: Symptomatik, Klassifikation, Ätiologie & Epidemiologie
- Diagnostik: Vorgehen, Verfahren
- Förderung: Ansätze, Programme

#### **(4) Arbeitsaufträge für die simulationsbasiert lernende Gruppe**

##### **Arbeitsauftrag 1: Erste Beobachtung**

Sehen Sie sich die Schulstunde im Klassenzimmer an. Was sehen und hören Sie? Wie verhalten sich die Schülerinnen und Schüler? Was fällt Ihnen auf?

##### **Arbeitsauftrag 2: Informationen zur Klassenleistung**

Verschaffen Sie sich einen Überblick zu Leistungsstand, Leistungsentwicklung und weitere Informationen zu den Schülerinnen und Schülern. Die entsprechenden Infos finden Sie in den *Schülerakten* und den *Dokumenten*: Aktionen/Gespräche, Arbeitsheft, Zeugnis, Infos, Klassenbuch, Lehrerkalender und Elternsprechtagsdokument.

##### **Arbeitsauftrag 3: Systematisierung der Informationen**

Fassen Sie Ihre bisherigen Beobachtungen zusammen. Fällt Ihnen etwas besonders auf? Beschreiben Sie das Problem, ohne zu interpretieren.

##### **Arbeitsauftrag 4a: Erste Hypothesensammlung**

Auf was deutet das Beobachtete hin? Formulieren Sie eine oder mehrere Arbeitshypothesen, die Ihre Beobachtungen erklären könnten.

##### **Arbeitsauftrag 4b: Hypothesenmodifikation und -selektion**

Diskutieren Sie Ihre Hypothesen in der Gruppe und wählen Sie die Hypothesen aus, die Sie weiterverfolgen möchten.

##### **Arbeitsauftrag 5: Vorbereitung des Selbststudiums**

Welche Informationen fehlen Ihnen noch, um Ihre Hypothesen zu überprüfen? Entscheiden Sie, welches Gruppenmitglied sich im Selbststudium bis zur nächsten Sitzung vertieft mit welchem Thema auseinandersetzen soll.

##### **Arbeitsauftrag 6a: Aktivierung von Hintergrundwissen (Selbststudium)**

Um Ihre bisherigen Erkenntnisse zu vertiefen und zu ergänzen, finden Sie vorbereitend auf die nächste Sitzung im [REDACTED] Lernmaterialien, die Sie für die Erarbeitung des Falls benötigen. Eignen Sie sich Hintergrundwissen zur Thematik an, indem Sie entsprechende Fachliteratur auf Grundlage Ihrer Vereinbarungen in der Gruppe recherchieren und lesen. Überarbeiten Sie Ihre Hypothesen aus Schritt 4 aufgrund des neu

erworbenen theoretischen Hintergrundes. Welche Hypothesen behalten Sie bei? Welche verwerfen Sie? Welche weiteren Informationen brauchen Sie, um Ihre Hypothesen zu überprüfen? Wie würden Sie diese Informationen im Sinne des diagnostischen Prozesses sammeln? Welche Vorgehensweise / Verfahren / Methoden möchten Sie einsetzen?

### **Arbeitsauftrag 6b: Datenerhebung, -auswertung und -interpretation**

Rufen Sie nun die diagnostischen Informationen unter "Schülerakten > Testwerte" auf und beginnen Sie mit der Interpretation. Dazu können Sie Ihr Hintergrundwissen aus Arbeitsauftrag 6a einbeziehen. Was sagen Ihnen die Testergebnisse? Was schließen Sie daraus?

### **Schritt 6c: Erarbeitung der Lösungsskizze**

Was ist Ihre Verdachtsdiagnose? Welche Handlungsmöglichkeiten / Verantwortlichkeiten haben Sie bzgl. der Diagnose? Wo sind andere fachliche Expert\*innen einzubeziehen?

Welche Interventionen / Fördermaßnahmen würden in Frage kommen? Welche Handlungsmöglichkeiten haben Sie bzgl. der Förderung? Wo sind Sie verantwortlich, wo andere fachliche Expert\*innen? Nutzen Sie dazu das erworbene Hintergrundwissen sowie die Testwerte (Schritt 6).

### **Schritt 7a: Ergebnissicherung 1**

Diskutieren Sie die entwickelten Lösungsansätze. Verabschieden Sie sich ggf. auch von ungeeigneten Lösungsansätzen und entscheiden Sie sich gemeinsam für den geeignetsten Lösungsansatz. Welche Hypothesen halten stand? Welche verwerfen Sie?

### **Schritt 7b: Ergebnissicherung 2**

Sichern Sie Ihre Ergebnisse auf einer Folie, die Sie gemeinsam im Breakoutraum erarbeiten. Sichern Sie die Folie mit einem Screenshot. Inhaltlich sollen Sie dabei die folgenden Bereiche berücksichtigen:

- Hintergrund: Symptomatik, Klassifikation, Ätiologie & Epidemiologie
- Diagnostik: Vorgehen, Verfahren
- Förderung: Ansätze, Programme

## (5) Screenshots der digitalen Simulation

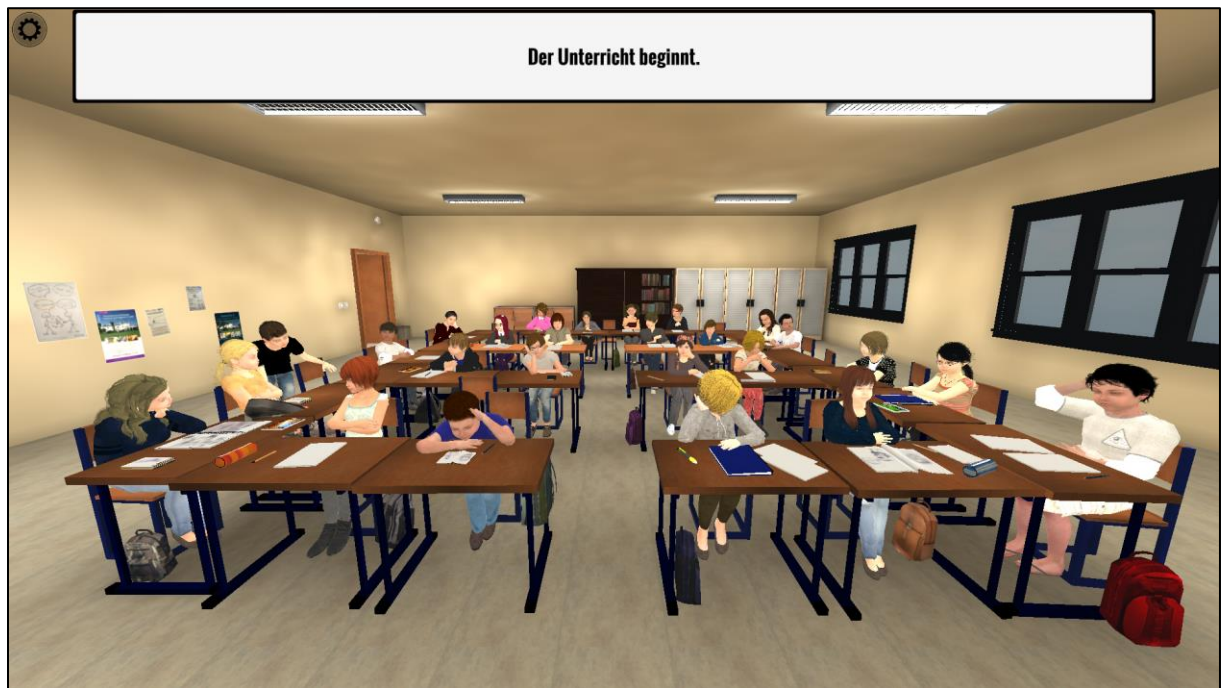

Screenshot 1: Beobachtung einer Schulstunde in der digitalen Simulation

GEProS 3.1.2

### Arbeitsaufträge

|    |  | Erste Beobachtung                              |
|----|--|------------------------------------------------|
| 1  |  | Erste Beobachtung                              |
| 2  |  | Infos zur Klassenleistung                      |
| 3  |  | Systematisierung der Informationen             |
| 4  |  | Generierung von Arbeitshypothesen              |
| 5  |  | Aktivierung Hintergrundwissen                  |
| 6  |  | Überarbeitung und Anpassung der Hypothesen     |
| 7  |  | Planung nachfolgender Schritte                 |
| 8  |  | Datenerhebung -auswertung und -interpretation  |
| 9  |  | Hypothesen Überprüfung                         |
| 10 |  | Verdachtsdiagnose und praktische Implikationen |

**Schulstunde Deutsch - Teil 1**

Starten

Screenshot 2: Arbeitsauftrag „Beobachtung“ in der digitalen Simulation



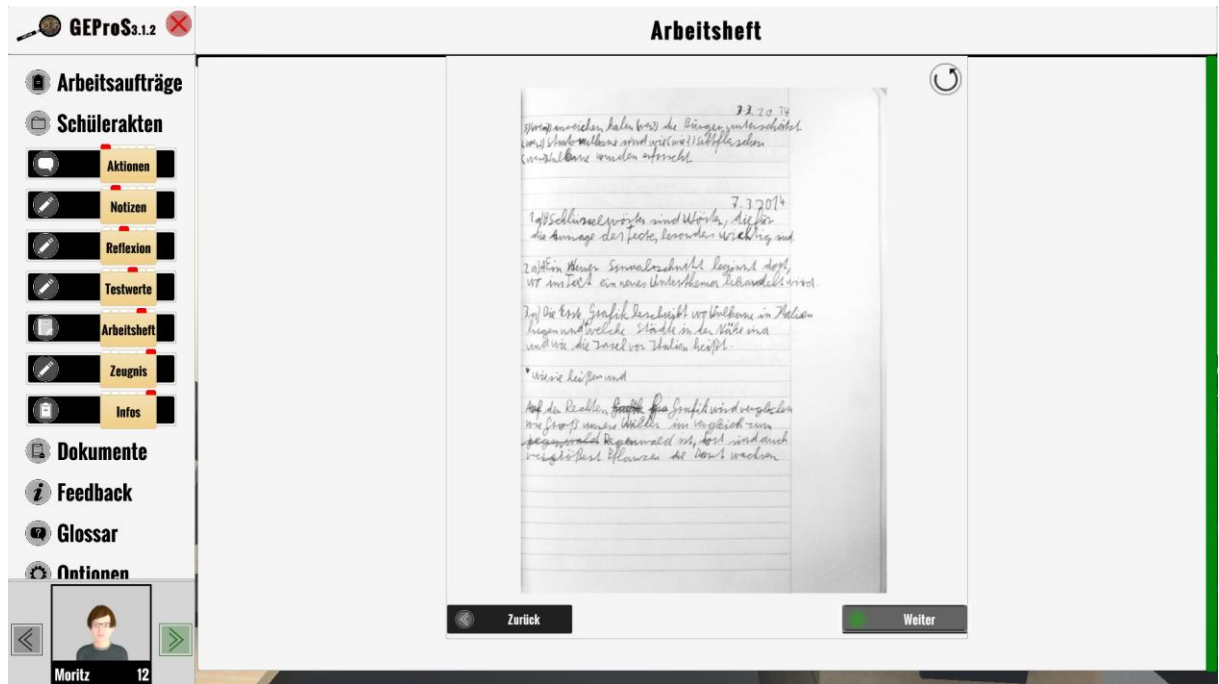

Screenshot 3: Deutsch-Arbeitsheft in der digitalen Simulation

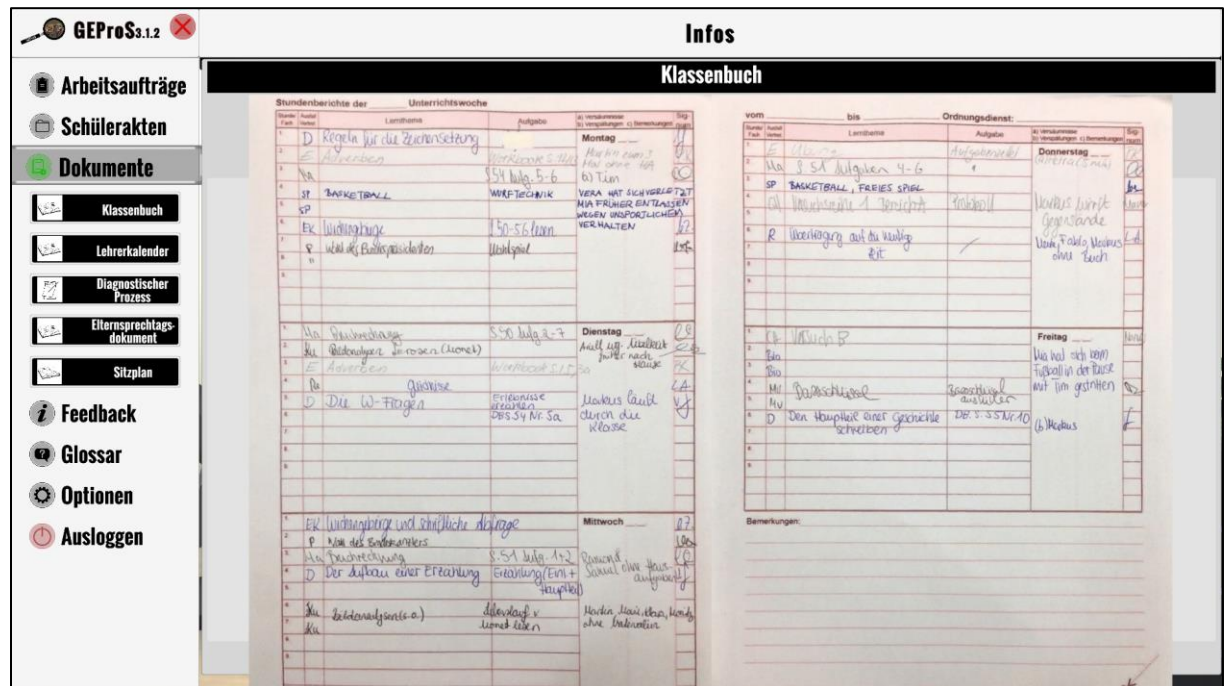

Screenshot 4: Klassenbuch in der digitalen Simulation

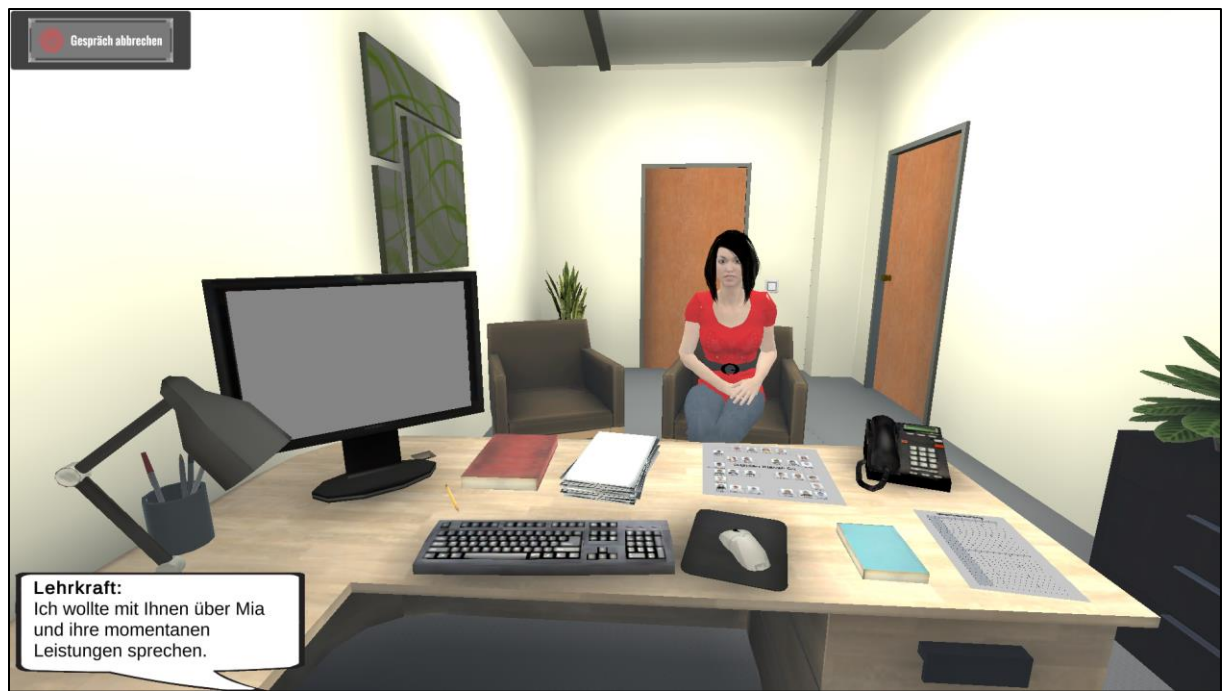

Screenshot 5: Elterngespräch in der digitalen Simulation
