# Supplementary material for: Wie können unterschiedliche Aspekte diagnostischer Kompetenz gefördert werden?
Source: Atypon-hosted journal article supplement (doi:10.1024/1010-0652/a000352), 2022-09-30
Supplement: 1010-0652_a000352_esm3.pdf [file 1010-0652_a000352_esm3.pdf]

**ESM 3: Systematisches Vorgehen entlang des diagnostischen Prozesses – Beispielitem**

---

**„Initiierung des diagnostischen Prozesses“**

Frau Nowak hat im März ihr zweites Staatsexamen mit den Fächern Englisch und Mathematik bestanden und ist nun eine Stelle als Lehrerin an der Heinrich-Heine-Gesamtschule in Recklinghausen angetreten. Dort arbeitet sie jetzt bereits seit wenigen Monaten und hat direkt zu Beginn eine 6. Klasse im Fach Englisch von einer schwangeren Kollegin übernommen. Kurze Zeit später hat Frau Nowak mit der Klasse die erste Klassenarbeit geschrieben, in der es in erster Linie um Verben im past tense ging. Bei der Korrektur war Frau Nowak überrascht von den insgesamt eher unterdurchschnittlichen Leistungen der Klasse. Ihre Vorgängerin hatte ihr leider nur wenige Informationen über die Klasse zukommen lassen. Eine der auffälligsten Klassenarbeiten stammt von Olli. Im Vergleich zu vielen seiner Klassenkameraden hat Olli sehr viele Flüchtigkeitsfehler gemacht, zum Beispiel Buchstaben oder Wörter ausgelassen, und eine klassische „Sauklaue“, die für Frau Nowak kaum zu entziffern war. Mit gutem Willen hat Olli noch ein „ausreichend“ für seine Leistung erhalten. Wie sollte Frau Nowak nun vorgehen?

- a) Sie sollte Ollis Verhalten und Leistungen im Unterricht und den Hausaufgaben beobachten und mit den Leistungen der Klassenarbeit vergleichen.
- b) Sie sollte die Klassenarbeit an die schwangere Kollegin weitergeben, die die Klasse vorher unterrichtete, um eine zweite Meinung zu Ollis Leistungen einzuholen. Die Kollegin hatte Frau Nowak bereits Unterstützung zugesichert.
- c) Sie sollte die nächsten Klassenarbeiten oder Abgaben abwarten, um Ollis Leistung umfassender beurteilen zu können.
- d) Sie sollte das Gespräch mit Olli suchen und so mögliche Schwierigkeiten erörtern, die zu seiner schlechten Leistung in der Klassenarbeit geführt haben.

***Richtig ist Antwort a).***
